# Supplementary material for: Reconstruction of bimetal CoFe0.13-MOF to enhance the catalytic performance in the oxygen evolution reaction
Source: Royal Society of Chemistry journal article supplement (doi:10.1039/d1cc06314f), 2021-12-04
Supplement: d1cc06314f1.pdf [file d1cc06314f1.pdf]

## Supporting Information

### Reconstruction of Bimetal CoFe<sub>0.13</sub>-MOF to Enhance the Catalytic Performance in Oxygen Evolution Reaction

*Kexin Yang<sup>1</sup> ‡, Zeqi Jin<sup>1</sup> ‡, Qicheng Zhang<sup>1</sup>, Qiming Chen<sup>1</sup>, Wenchao Peng<sup>1,2</sup>, Yang Li<sup>1,2</sup>,  
Fengbao Zhang<sup>1</sup>, Qing Xia<sup>1\*</sup>, Xiaobin Fan<sup>1,2\*</sup>*

<sup>1</sup>School of Chemical Engineering and Technology, State Key Laboratory of Chemical Engineering, Collaborative Innovation Center of Chemical Science and Engineering, Tianjin University, Tianjin, 300072, China.

<sup>2</sup>Chemistry and Chemical Engineering Guangdong Laboratory, Shantou, 515031 China.  
School of Chemical Engineering and Technology, State Key Laboratory of Chemical

#### Corresponding Author

\*Xiaobin Fan

Email: xiaobinfan@tju.edu.cn

\*Qing Xia

Email: xiaqing@tju.edu.cn

#### Contents:

Fig. S1 to S12

Tab. S1 to S3

## Experimental Details

### Synthesis of the CoFe<sub>0.13</sub>-MOF:

2-6 naphthalene dicarboxylic acid (165 mg) and Ferrocenecarboxylic acid (23 mg) were dissolved in 5 mL DMF and 1 mL NaOH (0.4 M) was added. Then the solution was mixed slowly with 5 mL DMF solution containing cobalt (II) nitrate nonahydrate (218 mg) in a 30 mL Teflon-lined stainless-steel autoclave. The Teflon-lined stainless-steel autoclave was heated for 15 h at 100 °C. The resulting products were washed with DMF and ethanol for three times and dried naturally.

### OER reconstruction:

The Amperometric i-t Curve program was run for 50000s in 1M KOH alkaline solution with an initial current of 10 mA cm<sup>-2</sup>, followed by rinsing with deionized water, and drying naturally to obtain deactivated CoFe<sub>0.13</sub>-MOF, namely, CoFe<sub>0.13</sub>O<sub>x</sub>H<sub>y</sub>.

### Solvothermal reconstruction:

The process of synthesizing CoFe<sub>0.13</sub>-MOF was repeated without adding 2-6 naphthalene dicarboxylic acid, Ferrocenecarboxylic acid and cobalt (II) nitrate nonahydrate. Finally, the refreshed CoFe<sub>0.13</sub>O<sub>x</sub>H<sub>y</sub>, is named as re-CoFe<sub>0.13</sub>O<sub>x</sub>H<sub>y</sub>.

**Materials characterization.** The phases in each sample were detected by X-ray diffraction (XRD, Bruker D8 Advanced, Germany). The molar ratio of Co:Fe was measured by inductively coupled plasma mass spectrometry (ICP-OES:Shimadzu ICPE-9800).The morphology and microstructure were examined by transmission electron microscopy (TEM, JEM-2100), scanning electron microscopy (SEM, S4800) equipped with an energy-dispersive X-ray analyzer (EDS). The chemical states of samples were concluded by X-ray photoelectron spectroscopy (XPS, ESCALAB 250 XI). electron spin resonance (ESR) spectra were conducted on Bruker EMX PLUS.

**Electrochemical measurements.** All the electrochemical data were collected from a CHI760E electrochemical workstation. A standard three-electrode cell was used with 1 M KOH as the electrolyte. Ag/AgCl (3.5 M KCl solution) electrode and a graphite rod were chosen as reference and counter electrodes, respectively. All the linear sweep voltammetry (LSV) data were recorded at a scan rate of 5 mV s<sup>-1</sup>. Time-dependent current density curves were obtained by chronoamperometric measurements. The electrochemical impedance spectroscopy (EIS) results were determined at 0.5 V vs. Ag/AgCl, and the corresponding frequency range is 0.1~10<sup>6</sup> Hz.

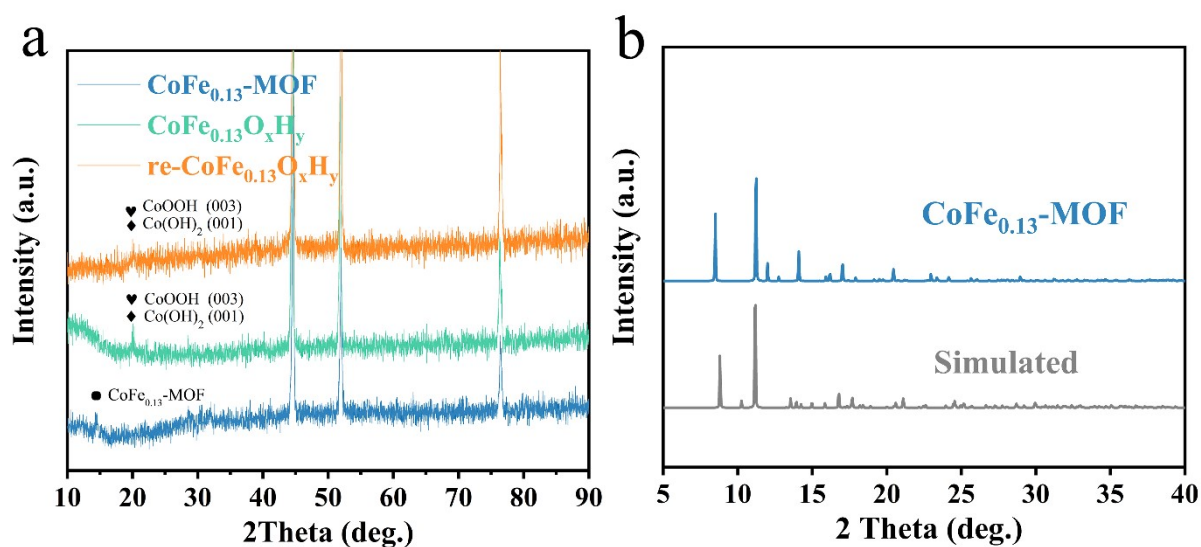

**Fig. S1** (a) XRD patterns of the prepared CoFe<sub>0.13</sub>O<sub>x</sub>H<sub>y</sub>, re-CoFe<sub>0.13</sub>O<sub>x</sub>H<sub>y</sub> and CoFe<sub>0.13</sub>-MOF. The crystal structure of CoOOH and Co(OH)<sub>2</sub> is shown in the inset. (b) XRD patterns of the CoFe<sub>0.13</sub>-MOF control sample without the presence of nickel foam and the simulated XRD pattern from previous study.

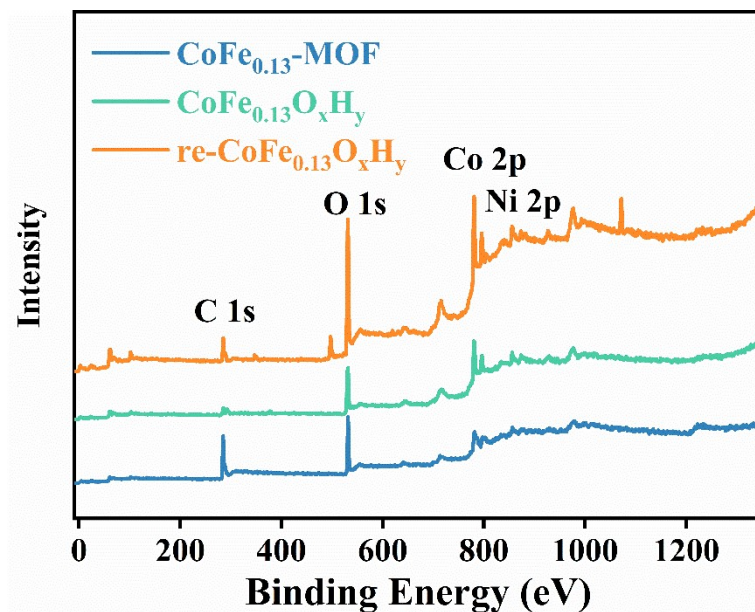

**Fig. S2** The full range XPS spectra, the peaks of C 1s, O 1s, Co 2p and Ni 2p are detected.

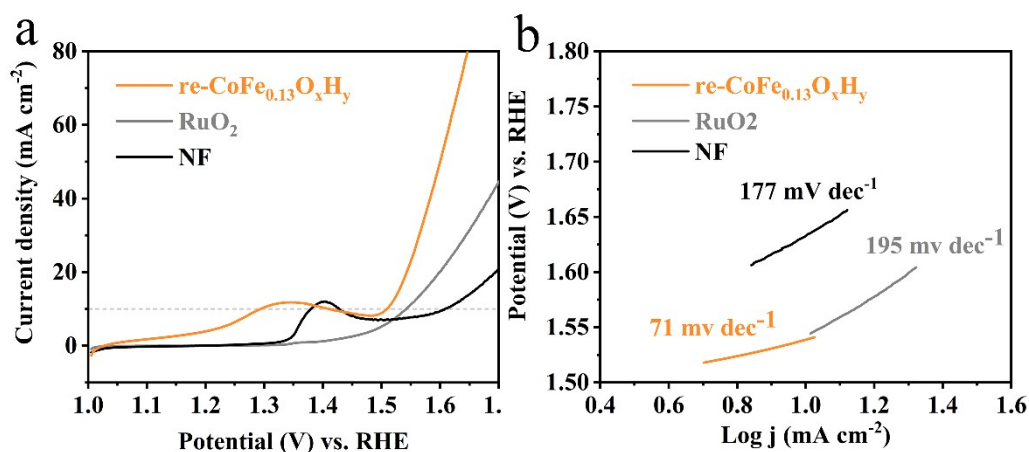

**Fig. S3.** Electrochemical characterization of re-CoFe<sub>0.13</sub>-MOF, commercial RuO<sub>2</sub> and the Ni foam. (a) Polarization curves. (b) Tafel slopes.

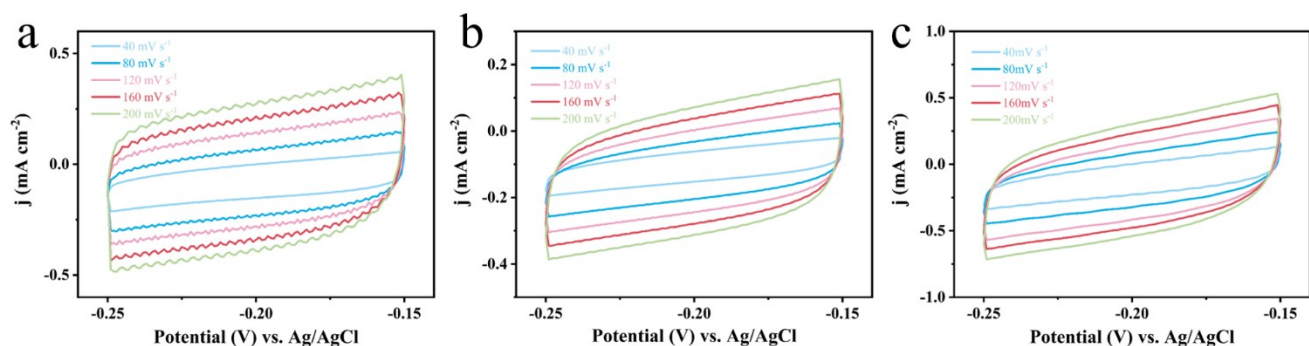

**Fig. S4.** Corresponding CV curves in non-Faraday region. CV cycling of (a) CoFe<sub>0.13</sub>-MOF, (b) CoFe<sub>0.13</sub>O<sub>x</sub>H<sub>y</sub> and (c) re-CoFe<sub>0.13</sub>O<sub>x</sub>H<sub>y</sub> in 1 M KOH from 40 mV s<sup>-1</sup> to 200 mV s<sup>-1</sup>.

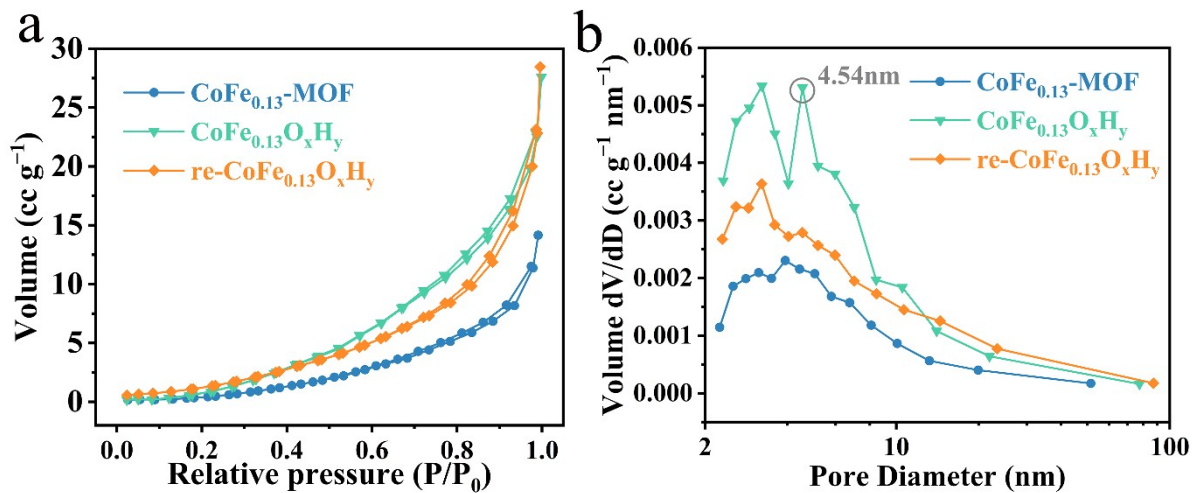

**Fig. S5** The pore structure characterization of the  $\text{CoFe}_{0.13}\text{-MOF}$ ,  $\text{CoFe}_{0.13}\text{O}_x\text{H}_y$ , and  $\text{re-CoFe}_{0.13}\text{O}_x\text{H}_y$  (a)  $\text{N}_2$  sorption isotherms, and (b) pore size distribution curves.

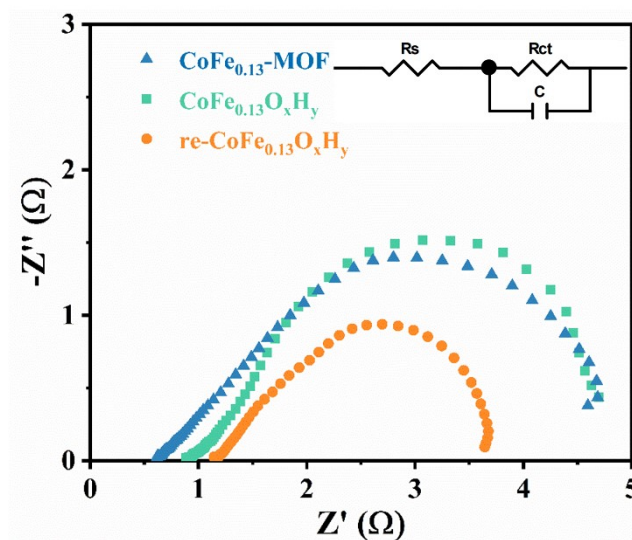

**Fig. S6** Nyquist plots. The  $\text{re-CoFe}_{0.13}\text{O}_x\text{H}_y$  suggests a smaller charge transfer resistance ( $\sim 2.5 \Omega$ ) than that of  $\text{CoFe}_{0.13}\text{-MOF}$  ( $\sim 4 \Omega$ ) and  $\text{CoFe}_{0.13}\text{O}_x\text{H}_y$  ( $\sim 4 \Omega$ ).

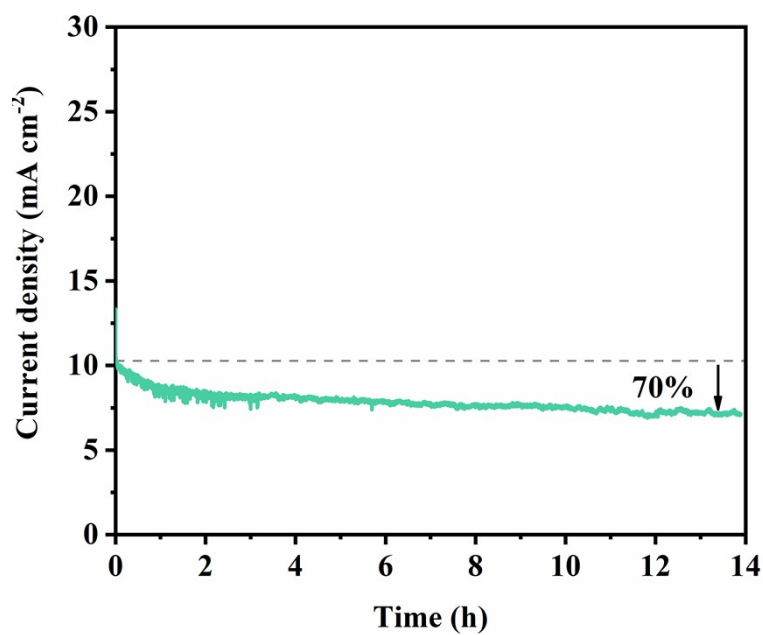

**Fig. S7** Stability test of the original CoFe<sub>0.13</sub>-MOF. The current density of the CoFe<sub>0.13</sub>-MOF drops to 70% in 50000s.

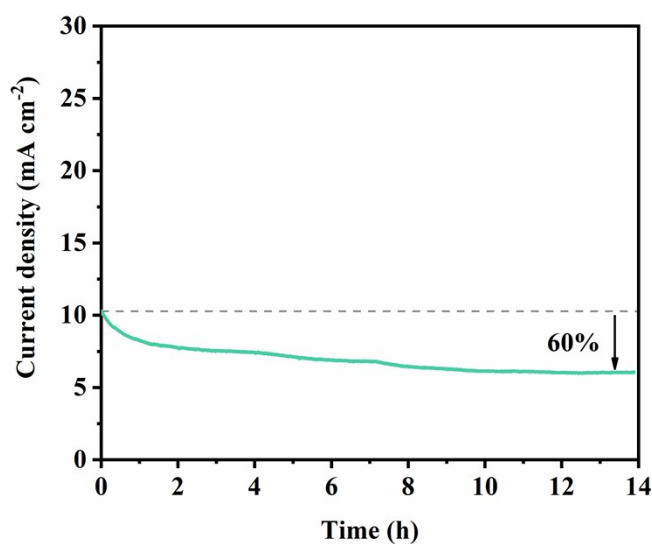

**Fig. S8** Stability test of the CoFe<sub>0.13</sub>-MOF-30h. The current density of the CoFe<sub>0.13</sub>-MOF-30h drops to 60% in 50000s.



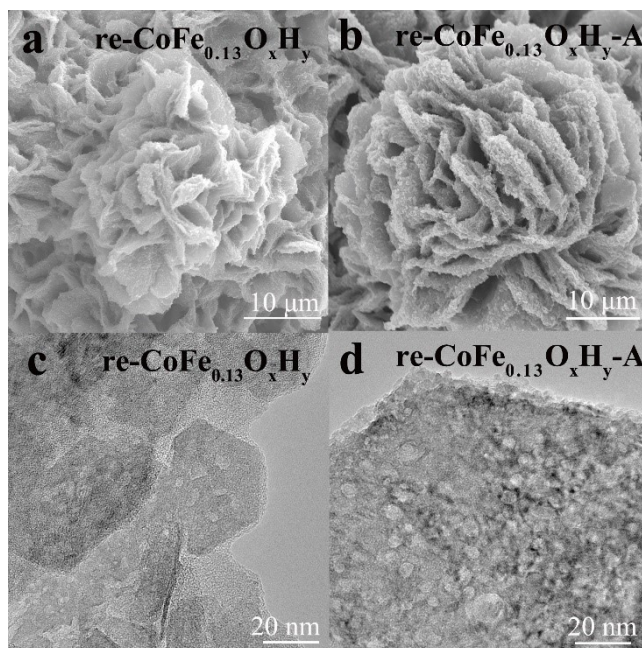

**Fig. S9** Morphology of re-CoFe<sub>0.13</sub>O<sub>x</sub>H<sub>y</sub> after stability test. SEM images of (a) re-CoFe<sub>0.13</sub>O<sub>x</sub>H<sub>y</sub> and (b) re-CoFe<sub>0.13</sub>O<sub>x</sub>H<sub>y</sub>-A. TEM images of (c) re-CoFe<sub>0.13</sub>O<sub>x</sub>H<sub>y</sub> and (d) re-CoFe<sub>0.13</sub>O<sub>x</sub>H<sub>y</sub>-A.

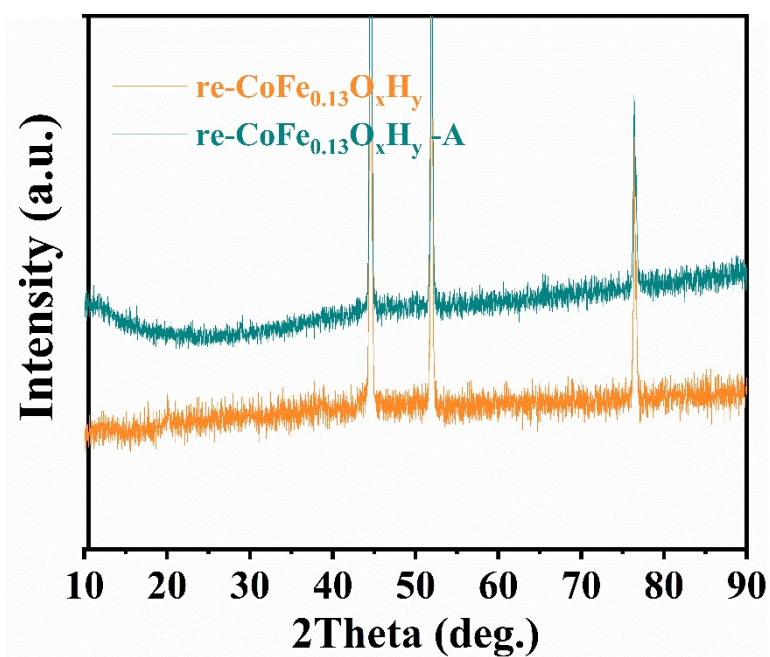

**Fig. S10** XRD patterns of the prepared re-CoFe<sub>0.13</sub>O<sub>x</sub>H<sub>y</sub>-A (the re-CoFe<sub>0.13</sub>O<sub>x</sub>H<sub>y</sub> after 85 h OER process).

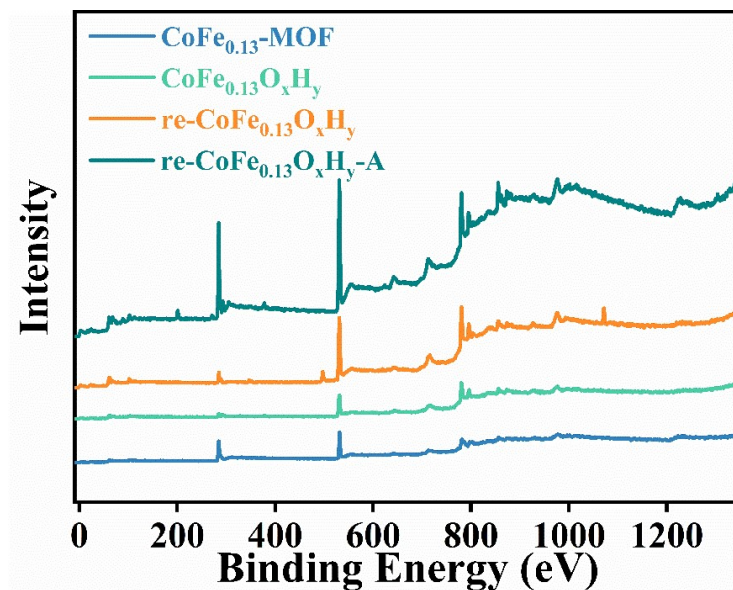

**Fig. S11** The full range XPS spectra of the  $\text{re-CoFe}_{0.13}\text{O}_x\text{H}_y\text{-A}$  (the  $\text{re-CoFe}_{0.13}\text{O}_x\text{H}_y$  after 85 h OER process).

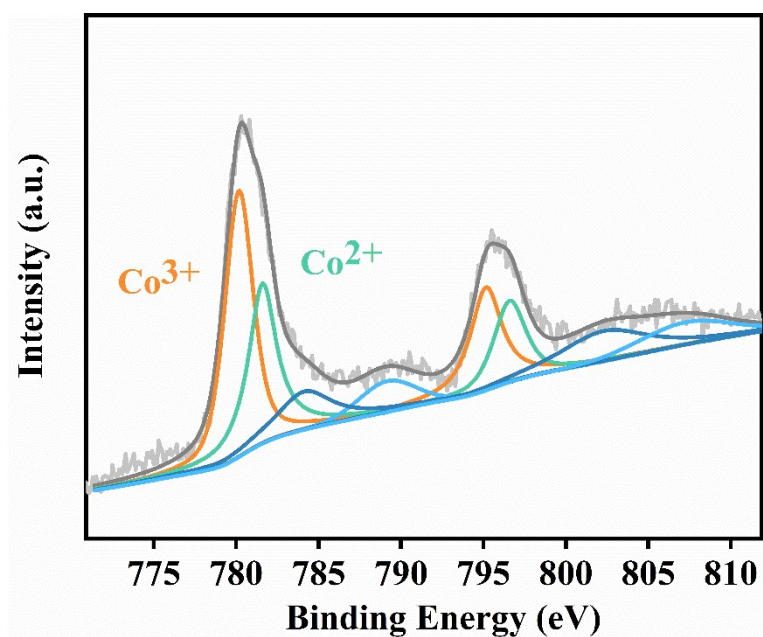

**Fig. S12** The Co 2p XPS spectra of the  $\text{re-CoFe}_{0.13}\text{O}_x\text{H}_y\text{-A}$  (the  $\text{re-CoFe}_{0.13}\text{O}_x\text{H}_y$  after 85 h OER process). The ratio of  $\text{Co}^{2+}$  to  $\text{Co}^{3+}$  is 0.77.



**Tab. S1** The element content in the CoFe<sub>0.13</sub>-MOF.

| Element | Content <sup>[a]</sup><br>wt (%) |
|---------|----------------------------------|
| Co      | 4.49                             |
| Fe      | 0.388                            |

[a]The data were measured by inductively coupled plasma mass spectrometry (ICP-EOS).

**Tab. S2** XPS surface element content of the CoFe<sub>0.13</sub>-MOF

| Name  | Atomic % |
|-------|----------|
| C1s   | 60.54    |
| O1s   | 29.52    |
| Fe2p3 | 0.62     |
| Ni2p3 | 2.22     |
| Co2p3 | 7.09     |

**Tab. S3** Comparison of stability with other MOF catalysts.

| Catalyst                                                 | Test Condition                   | Stability Performance |
|----------------------------------------------------------|----------------------------------|-----------------------|
| This work                                                | 1 M KOH, 10 mA cm <sup>-2</sup>  | 85.0 h                |
| CoFe-BDC <sup>1</sup>                                    | 1 M KOH, 10 mA cm <sup>-2</sup>  | < 1.0 h               |
| ZIF-67(002) <sup>2</sup>                                 | 1 M KOH, 10 mA cm <sup>-2</sup>  | 8.0h                  |
| Co <sub>0.6</sub> Fe <sub>0.4</sub> -MOF-74 <sup>3</sup> | 1 M KOH, 10 mA cm <sup>-2</sup>  | 12.0h                 |
| CoBDC-Fc <sup>4</sup>                                    | 1 M KOH, 100 mA cm <sup>-2</sup> | 80.0h                 |
| CoOOH <sup>5</sup>                                       | 1 M KOH, 10 mA cm <sup>-2</sup>  | 100h                  |
| γ-CoOOH <sup>6</sup>                                     | 1 M KOH, 10 mA cm <sup>-2</sup>  | 13.0h                 |
| F-CoOOH/NF <sup>7</sup>                                  | 1 M KOH, 30 mA cm <sup>-2</sup>  | 10.0h                 |
| FeCoOOH <sup>8</sup>                                     | 1 M KOH, 10 mA cm <sup>-2</sup>  | 15.0h                 |

## Reference

1. J. Xu, X. Zhu and X. L. Jia, *Acs Sustainable Chemistry & Engineering*, 2019, **7**, 16629-16639.
2. J. W. Wan, D. Liu, H. Xiao, H. P. Rong, S. Guan, F. Xie, D. S. Wang and Y. D. Li, *Chemical Communications*, 2020, **56**, 4316-4319.
3. X. H. Zhao, B. Pattengale, D. H. Fan, Z. H. Zou, Y. Q. Zhao, J. Du, J. E. Huang and C. L. Xu, *Acs Energy Letters*, 2018, **3**, 2520-2526.
4. Z. Hu, S. L. Shi, L. Wang, S. J. Chen, Y. S. You, S. H. Wang and C. Chen, *Applied Surface Science*, 2020, **528**.
5. J. Zhou, Y. Wang, X. Z. Su, S. Q. Gu, R. D. Liu, Y. B. Huang, S. Yan, J. Li and S. Zhang, *Energy & Environmental Science*, 2019, **12**, 739-746.
6. J. H. Huang, J. T. Chen, T. Yao, J. F. He, S. Jiang, Z. H. Sun, Q. H. Liu, W. R. Cheng, F. C. Hu, Y. Jiang, Z. Y. Pan and S. Q. Wei, *Angewandte Chemie-International Edition*, 2015, **54**, 8722-8727.
7. P. Z. Chen, T. P. Zhou, S. B. Wang, N. Zhang, Y. Tong, H. X. Ju, W. S. Chu, C. Z. Wu and Y. Xie, *Angewandte Chemie-International Edition*, 2018, **57**, 15471-15475.
8. T. T. H. Nguyen, J. Lee, J. Bae and B. Lim, *Chemistry-a European Journal*, 2018, **24**, 4724-4728.
